# Supplementary material for: Activity of hippocampal adult-born neurons regulates alcohol withdrawal seizures
Source: JCI journal article supplement (doi:10.1172/jci.insight.128770), 2019-10-02

Supplemental material

Activity of hippocampal adult-born neurons regulates  
alcohol withdrawal seizures

Daehoon Lee<sup>1</sup>, Balu Krishnan<sup>2</sup>, Hai Zhang<sup>1</sup>, Hee Ra Park<sup>1</sup>, Eun Jeoung Ro<sup>1</sup>,  
Yu-Na Jung<sup>3</sup>, and Hoonkyo Suh<sup>1,\*</sup>

1, Department of Neurosciences, Cleveland Clinic, Cleveland, OH 44195, USA  
2, Epilepsy Center, Neurological Institute, Cleveland Clinic, OH 44195, USA  
3, Department of Biochemistry, Case Western Reserve University, Cleveland, OH  
44106, USA

\*, Correspondence should be addressed to

Hoonkyo Suh, Ph. D.  
Department of Neurosciences, NC 30  
Cleveland Clinic  
Cleveland, OH 44195  
Email: [Suhh2@ccf.org](mailto:Suhh2@ccf.org)  
Tel: 216-444-5895  
Fax: 216-444-7927

## Methods

**Cell counting.** To examine the effect of alcohol withdrawal (AW) on proliferation of neural stem cells in the hippocampus, 4 doses of BrdU (50mg/kg, 2-hour intervals) were injected into mice at the end of 2 and 4 weeks of AW. Twenty-four hours after the final BrdU injection, brains were isolated and sliced coronally at a thickness 40  $\mu\text{m}$ . The number of BrdU<sup>+</sup> cells was quantified in every 6<sup>th</sup> section of the hippocampus. In addition to the standard procedure described in the Method, additional antigen retrieval procedures, including the treatment with 2 M HCl for 30 min at 37°C and neutralization with 0.1 M boric acid for 10 min, were applied for BrdU antibody staining (Accurate QTB0030, Rat, 1:500). All fluorescence images were collected using laser confocal microscopy (SP5, Leica, Germany) and further processed in Adobe Photoshop (Adobe Systems Incorporated, San Jose, CA).

**Coverage of IBA1- and GFAP-positive cells.** The effects of AW on microglia and astrocytes were evaluated by immunohistochemistry (IHC) against IBA1 and GFAP, respectively. IHC with IBA1 (monoclonal mouse anti-IBA-1, Chemicon; MABN92; 1:500) and GFAP (polyclonal rabbit anti-GFAP, DakoCytomation; Z0334; 1:500) was performed in three horizontal sections representing the dorsal, intermediate, and ventral hippocampus of pair- and alcohol-fed mice (n=3 mice per group). The coordinates used for the experiments are as follows: Dorsal, Interaural: 5.40 mm, Bregma: -4.60 mm; Intermediate, interaural: 3.90 mm, Bregma: -6.10 mm; and ventral, Interaural: 1.69 mm, Bregma: -8.31 mm. The percentage of area covered by IBA1- or GFAP-positive signals were calculated by using Fiji (ImageJ) software.

## Supplementary Figure Legends

**Figure S1. Establishment of chronic alcohol exposure mouse model.** (A) Cartoon depicting the alcohol feeding schedule. (B) Amounts of daily consumed alcohol (open circle;  $20.19 \pm 1.53 \text{ g/kg}$ , n = 52) and accumulated alcohol over the experimental periods are shown (filled circle,  $\text{g/kg}$ ; 0.5 week,  $64.77 \pm 1.98$ ; 1 week,  $186.84 \pm 1.37$ , 2 weeks,  $306.29 \pm 1.32$ ; 3 weeks,  $425.22 \pm 1.51$ ; 4 weeks,  $545.01 \pm 1.53$ ; n =52). (C) Alcohol-fed mice show a significantly higher amount of peak BAC when measured 4.5 hours after the onset of the dark cycle (Two-tailed unpaired t test,  $P < 0.0001$ , alcohol-fed mice,  $395.0 \pm 8.73 \text{ mg/dL}$ , n = 25; pair-fed mice,  $37.2 \pm 4.69 \text{ mg/dL}$ , n = 19). (D) Control and alcohol-fed mice gained comparable

amounts of weight over the course of the feeding schedule (Two-way repeated measures ANOVA; no significant diet effect  $F_{1,51} = 20.71$ ). Data represent Mean  $\pm$  S.E.M.

**Figure S2. Automatic detection and counting of epileptiform SWDs.** (A) Four electrodes were implanted into the left and right motor cortex (LC and RC), left and right hippocampus (LH and RH), and one electrode was used for reference (Ref). (B) A picture showing the continuous Video-EEG monitoring system. (C) Only spikes that passed both initiation threshold (THi) and termination threshold (THt) were counted. For the present analysis, we set THi and THt at 100  $\mu$ V and 0 $\mu$ V, respectively. SWDs with amplitudes greater than 2 times background EEG activity were scored as positive. (D) Representative image of SWD. Red dotted lines indicate the range of average intensity of field potentials. This EEG and analysis method were used throughout the experiments.

**Figure S3. Inhibitory DREADD-mediated inducible and reversible decrease of epileptiform SWDs.** Vehicle (0.5% DMSO in saline) and CNO were administered on Day 1 (D1) and Day 2 (D2), respectively, and EEG was monitored for 14 hours on D1 and D2. The frequency of epileptiform SWDs during the first (7h) and second (14h) seven-hour periods are shown at the given days. CNO administration decreased the frequency of epileptic SWDs in the first 7 hours compared to vehicle injection, which returned to basal levels during the second 7 hours in NCE:M4<sup>f/f</sup> mice. However, CNO injection did not affect the induction of epileptiform SWDs in control-fed naïve or NCE:M4<sup>f/f</sup> mice, nor alcohol-fed naïve mice, indicating that CNO-mediated induction of epileptic SWDs was dependent upon both alcohol withdrawal and the presence of hM4Dq receptors in newborn DGCs. The effects of CNO on the expression of epileptiform SWDs were determined by two-way repeated measures ANOVAs; \*\* $P < 0.01$  and \*\*\* $P < 0.001$  were determined by Bonferroni *post hoc* tests.

**Figure S4. An inducible and reversible induction of epileptic SWDs by excitatory DREADDs.** Vehicle (0.5% DMSO in saline) and CNO were administered on Day 1 (D1) and Day 2 (D2), respectively, and EEG was monitored for 14 hours on D1 and D2. The frequency of epileptiform SWDs during the first and second seven-hour periods is presented at given days. CNO administration increased the frequency of epileptic SWDs compared to vehicle injection,

and this returned to basal levels during the second seven hours in NCE:M3<sup>f/f</sup> mice. However, CNO injection did not affect the induction of epileptiform SWDs in control-fed naïve or NCE:M3<sup>f/f</sup> mice, nor alcohol-fed naïve mice, indicating that CNO-mediated induction of epileptic SWDs is dependent upon both alcohol withdrawal and the presence of hM3Dq receptors in newborn DGCs. The effect of CNO on the expression of epileptiform SWDs was determined by two-way repeated measures ANOVAs;  $**P < 0.01$  and  $***P < 0.001$  were determined by Bonferroni *post hoc* tests.

**Figure S5. Alcohol withdrawal decreases hippocampal neurogenesis.** (A) Diagram showing the schedule of BrdU injections at 2 and 4 weeks of abstinence. (B) BrdU<sup>+</sup> cells were increased at 2 weeks of abstinence, but not at 4 weeks (Two-tailed unpaired t test,  $P < 0.01$ , 2 weeks of abstinence, control: n = 3 mice, alcohol: n = 4 at 2 weeks of abstinence; control: n = 5, alcohol: n = 6 at 4 weeks of abstinence). A representative image illustrates newborn DGCs positive for BrdU (red).  $**P < 0.01$ .

**Figure S6. Alcohol withdrawal does not significantly impact glial cells.** (A-B) AW did not change the coverage of IBA- and GFAP-positive cells, indicating that AW did not significantly impact gliogenesis at 2, 4, or 8 weeks of abstinence (n=3 per group). The effects of AW on IBA- and GFAP-positive microglia and astrocytes were determined by two-tailed unpaired t-tests.

**Figure S1**

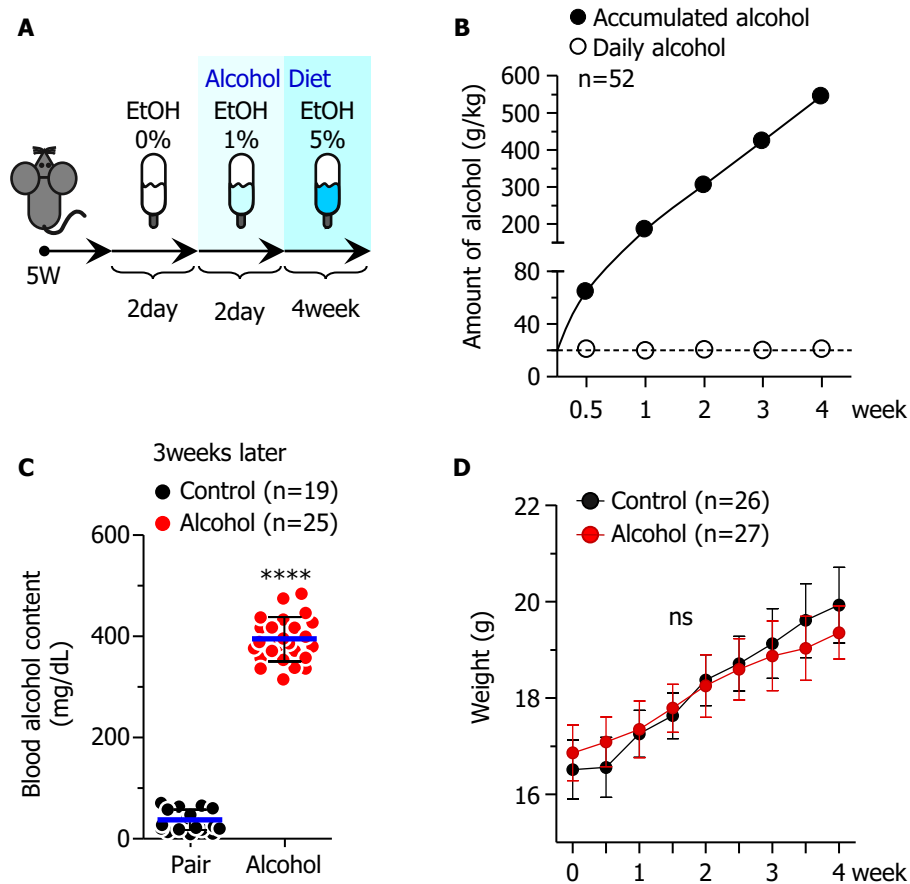

**Figure S2**

**A**

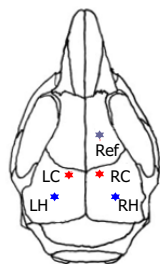

**B**

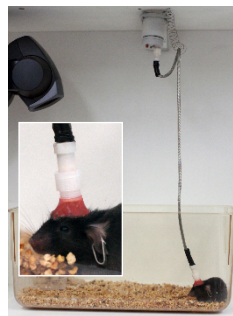

**C**

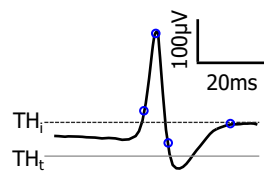

**D**

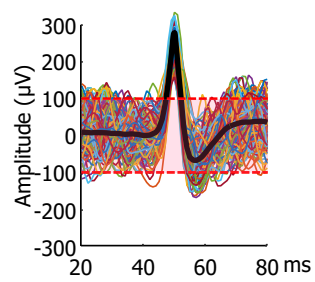

**Figure S3**

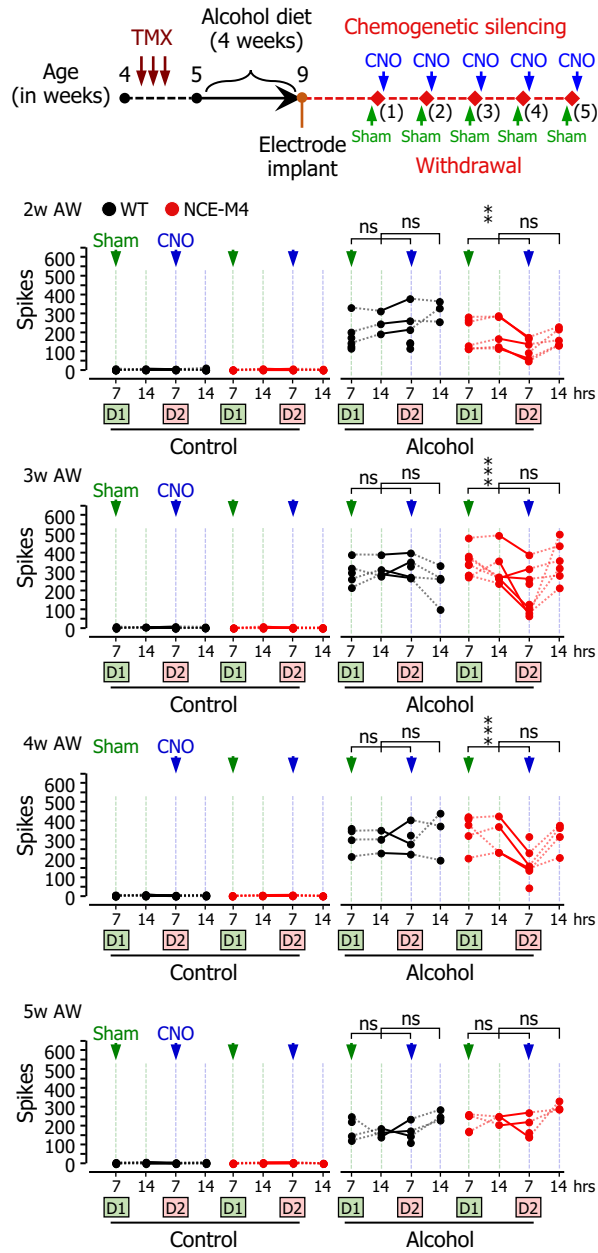

**Figure S4**

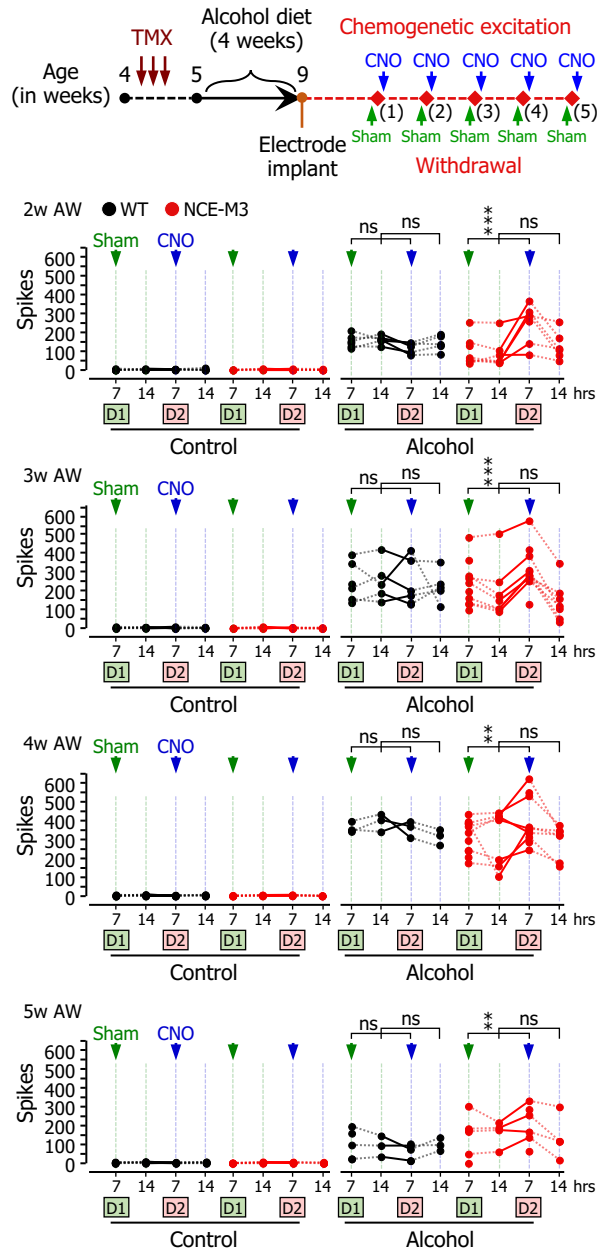



**Figure S5**

**A**

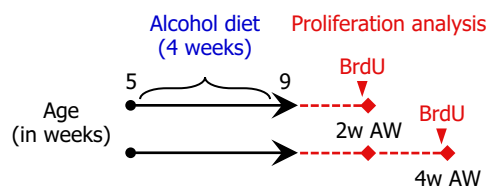

**B**

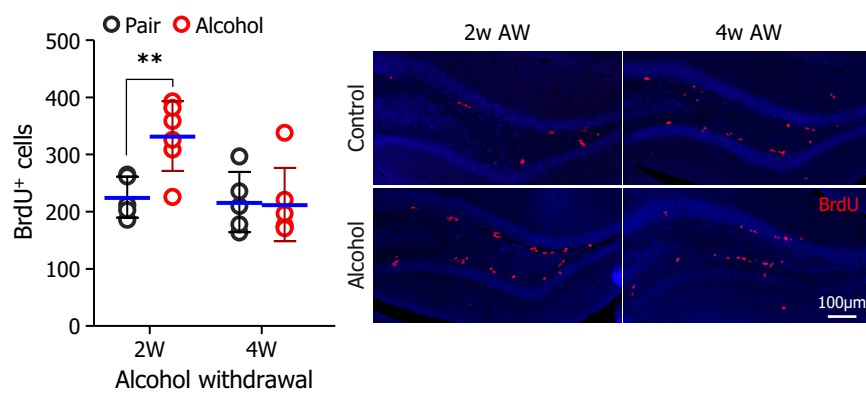

**Figure S6**

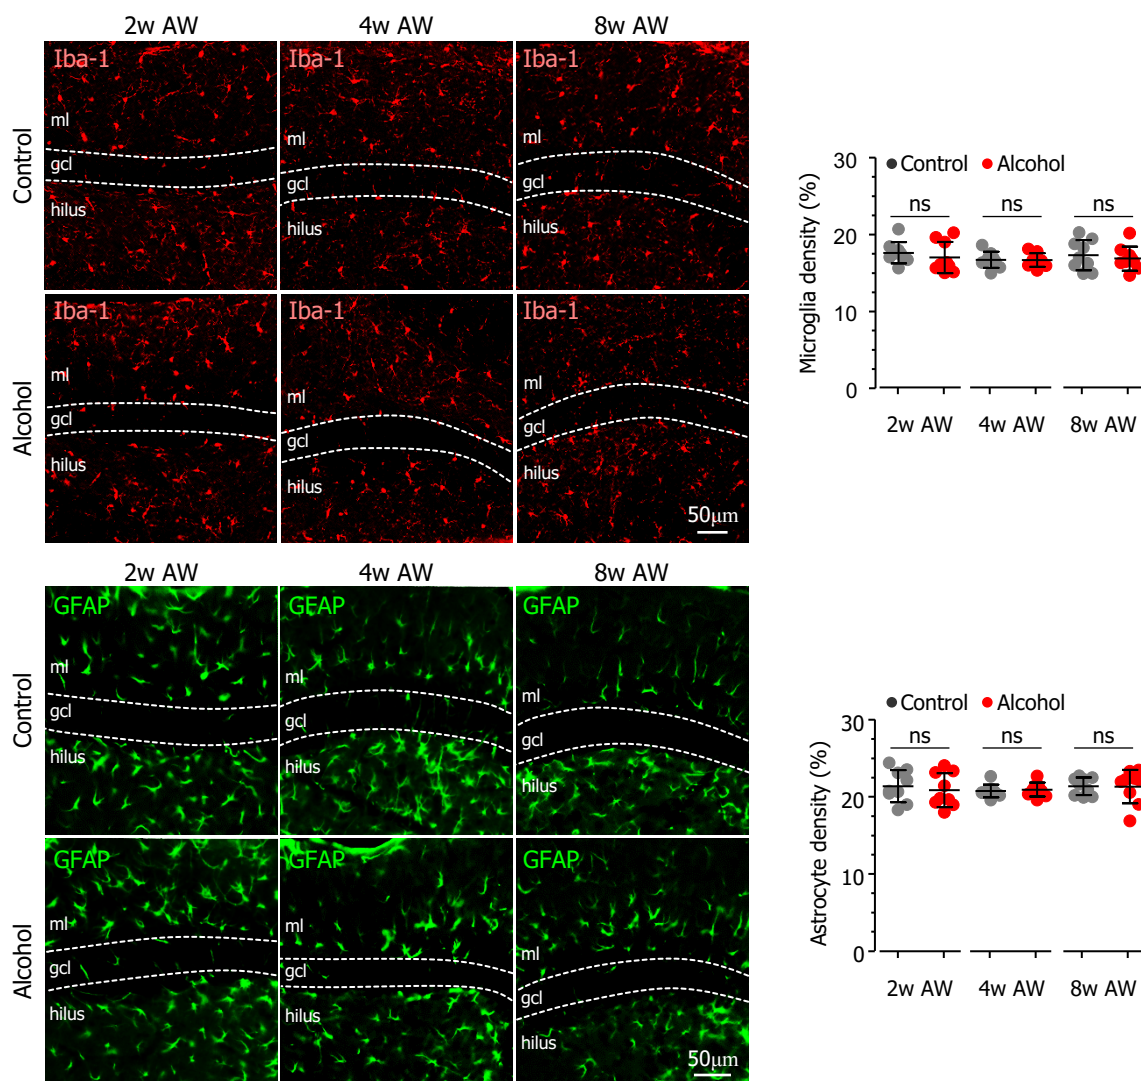

Supplement: sd1 [file 1]
